# Supplementary material
Source: Springer Nature journal article supplement (https://www.springermedizin.de/resource/supplementary/13054_2010_8782_MOESM2_ESM.pdf/9732558)

A

| Urine IL-6 (pg/mg) | Sensitivity | 1 - Specificity |
|--------------------|-------------|-----------------|
| 0                  | 1.000       | 1.000           |
| 5                  | 1.000       | 0.923           |
| 15                 | 1.000       | 0.846           |
| 25                 | 1.000       | 0.692           |
| 40                 | 1.000       | 0.615           |
| 55                 | 1.000       | 0.538           |
| 65                 | 1.000       | 0.308           |
| 75                 | 0.875       | 0.308           |
| 105                | 0.750       | 0.231           |
| 150                | 0.750       | 0.154           |
| 225                | 0.625       | 0.154           |
| 330                | 0.625       | 0.077           |
| 485                | 0.625       | 0.000           |
| 660                | 0.500       | 0.000           |
| 875                | 0.375       | 0.000           |
| 1125               | 0.250       | 0.000           |
| 6295               | 0.125       | 0.000           |
| 11,370             | 0.000       | 0.000           |

B

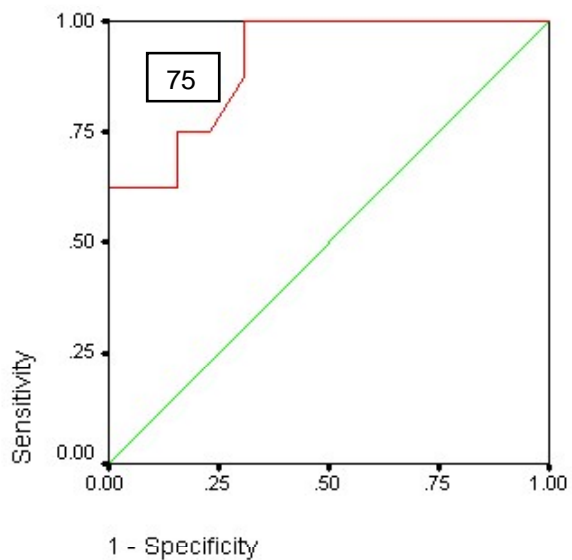

Supplement: MOESM2 [file 9732558]
